# Supplementary material for: Widespread Alu repeat-driven expansion of consensus DR2 retinoic acid response elements during primate evolution
Source: PubMed Central journal article supplement (PMC1785376; doi:10.1186/1471-2164-8-23), 2007-01-19
Supplement: 1471-2164-8-23-S4.pdf [file 1471-2164-8-23-S4.pdf]

**A**

```

AluSx      61 TCACCTGAGGTCAGGAGTTTCGAGACCAGCCTGGCCAACATGGTGAAACCCCGT 113
AluSx_4    61 TCACCTGAGGTCAGGAGTTCAAGACCAGCCTGGCCAACATGGTGAAACCCCGT 113
AluSg      61 TCAC--GAGGTCAGGAGTTTCGAGACCAGCCTGGCCAACATGGTGAAACCCCGT 111
AluSg1     61 TCAC--GAGGTCAGGAGTTTCGAGACCAGCCTGGCCAAGATGGTGAAACCCCGT 111
AluSg_4    61 TCAC--GAGGTCAGGAGTTCAAGACCAGCCTGGCCAAGATGGTGAAACCCCGT 111
AluSg_14   61 TCAC--GAGGTCAGGAGTTCAAGACCAGCCTGGCCAAGATGGTGAAACCCCGT 111
AluSg_16   61 TCAC--GAGGTCAGGAGTTCAAGACCAGCCTGGCCAAGATGGTGAAACCCCGT 111
AluSg_24   61 TCAC--GAGGTCAGGAGTTCAAGACCAGCCTGGCCAACATGGTGAAACCCCGT 111
AluSg_27   61 TCAC--GAGGTCAGGAGTTCAAGACCAGCCTGGCCAAGATGGTGAAACCCCGT 111
AluSq      61 TCACCTGAGGTCAGGAGTTTCGAGACCAGCCTGGCCAACATGGTGAAACCCCGT 113
AluSq_6    61 TCACCTGAGGTCAGAAGTTCAAGACCAGCCTGGTCAACATGGTGAAACCCCGT 113
AluSp      61 TCACCTGAGGTCGGGAGTTTCGAGACCAGCCTGACCAACATGGAGAAACCCCGT 113
AluSc      61 TCAC--GAGGTCAAGAGATCGAGACCATCCTGGCCAACATGGTGAAACCCCGT 111
          RGKTCANNRGKTCA
  
```

**B**

| Alu Family | # in genome | % with DR2 | Rebase Alu family |
|------------|-------------|------------|-------------------|
| AluSx_4    | 485         | 59.59      | AluSx (75%)       |
| AluSg_4    | 4712        | 67.32      | AluSg1 (76%)      |
| AluSg_14   | 3587        | 58.49      | AluSg (75%)       |
| AluSg_16   | 995         | 68.84      | AluSg1 (67%)      |
| AluSg_24   | 1979        | 62.81      | AluSg (82%)       |
| AluSg_27   | 300         | 60.33      | AluSg1 (71%)      |
| AluSq_6    | 1032        | 59.88      | AluSq (85%)       |

**C**

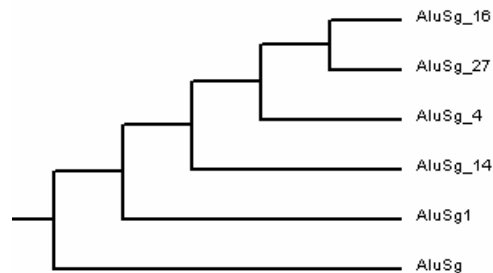

**Supplemental Figure 1 -** (A) Alignment of AluS with Alu families from Price et al. [26] that contain consensus RARE DR2. (B) Frequency of RARE DR2 for Alu families from Price et al. (C) Cladogram of AluSg subfamilies
